# Supplementary material
Source: publisher figshare collection journal article supplement (https://karger.figshare.com/ndownloader/files/31579007)
Supplement: Supplementary file 1 [file 31579007]

Supplemental Table 1. Univariate associations between tested covariates and the change in Wlast4 between the baseline and follow-up ergometry tests in separate linear regression analyses.

|  | **β** | **CI95%** | **p** |
| --- | --- | --- | --- |
| **ARBs** | -0.15 | -0.17-0.14 | 0.096 |
| **Calcium channel blockers** | 1.55 | -0.02-0.21 | 0.088 |
| **LVEDD** | 0.16 | 0.00-0.02 | 0.076 |
| **Bicarbonate** | 0.21 | 0.00-0.05 | 0.02 |
| **Carbon dioxide** | 0.18 | 0.00-0.21 | 0.05 |
| **Base excess** | 0.20 | 0.00-0.04 | 0.03 |

CI = confidence interval; ARB = angiotenin receptor blocker; LVEDD = mean left ventricular end-diastolic diameter of the echocardiographies performed at rest prior to the ergometry tests. The biochemical data are derived from the calculated cumulative means of the follow-up blood tests regularly collected every 3-month intervals between the baseline and follow-up ergometry tests.
